# Supplementary material for: Preparation of porous polymer monolithic column using functionalized graphene oxide as a functional crosslinker for high performance liquid chromatography separation of small molecules
Source: Royal Society of Chemistry journal article supplement (doi:10.1039/c3an01122d), 2013-01-01
Supplement: c3an01122d.pdf [file c3an01122d.pdf]

# Supporting Information

## **Preparation of porous polymer monolithic column using functionalized graphene oxide as a functional crosslinker for high performance liquid chromatography separation of small molecules**

**Yaping Li,<sup>a,b</sup> Li Qi \*<sup>a</sup> and Huimin Ma<sup>a</sup>**

<sup>a</sup> Beijing National Laboratory for Molecular Sciences; Key Laboratory of Analytical Chemistry for Living Biosystems, Institute of Chemistry, Chinese Academy of Sciences, Beijing, 100190, P. R. China.

<sup>b</sup> Graduate School, University of Chinese Academy of Sciences, Beijing, 100049, P. R. China.

\* Correspondence: Li Qi

Associate Prof. Dr.  
Zhongguancun Beiyijie 2#  
Beijing 100190, China  
E-mail: **qili@iccas.ac.cn**  
Tel: +86-10-82627290  
Fax: +86-10-62559373

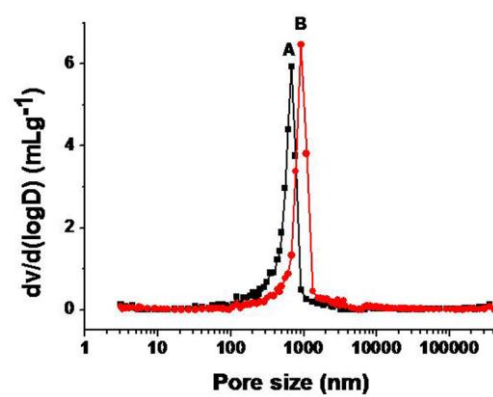

**Fig. S1.** Pore size distribution curves of (A) poly(GMA-co-EDMA) monolith (B) monolith copolymerized from TMSPMA-modified GO by mercury intrusion porosimetry.

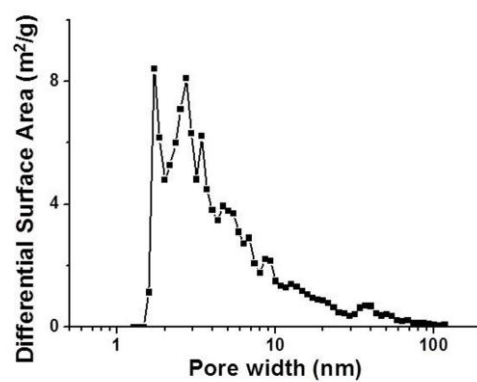

**Fig. S2.** The pore size distribution curve for the monolithic poly (GMA-co-EDMA) column copolymerized from 0.05 wt% TMSPMA-modified GO obtained from the adsorption branch of nitrogen adsorption isotherm measurement.

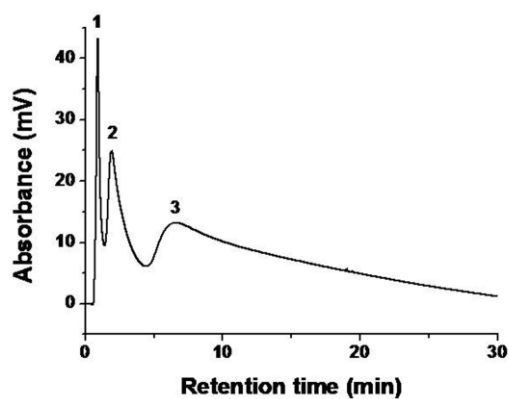

Fig. S3. Separation of steroid mixtures on the monolithic poly (GMA-co-EDMA) column containing 0.05 wt% pristine GO. Conditions: column, 50.0 mm  $\times$  4.6 mm i.d., mobile phase, 25% ACN in water, flow rate 1.0 mL $\cdot$ min $^{-1}$ , UV detection at 254 nm. Peak: (1) hydrocortisone, (2) prednisone acetate, (3) medroxyprogesterone acetate.
